# Supplementary material for: Explorative Screening of Bioactivities Generated by Plant-Based Proteins after In Vitro Static Gastrointestinal Digestion
Source: PubMed Central journal article supplement (PMC7762166; doi:10.3390/nu12123746), 2020-12-05
Supplement: nutrients-12-03746-s001.pdf [file nutrients-12-03746-s001.pdf]

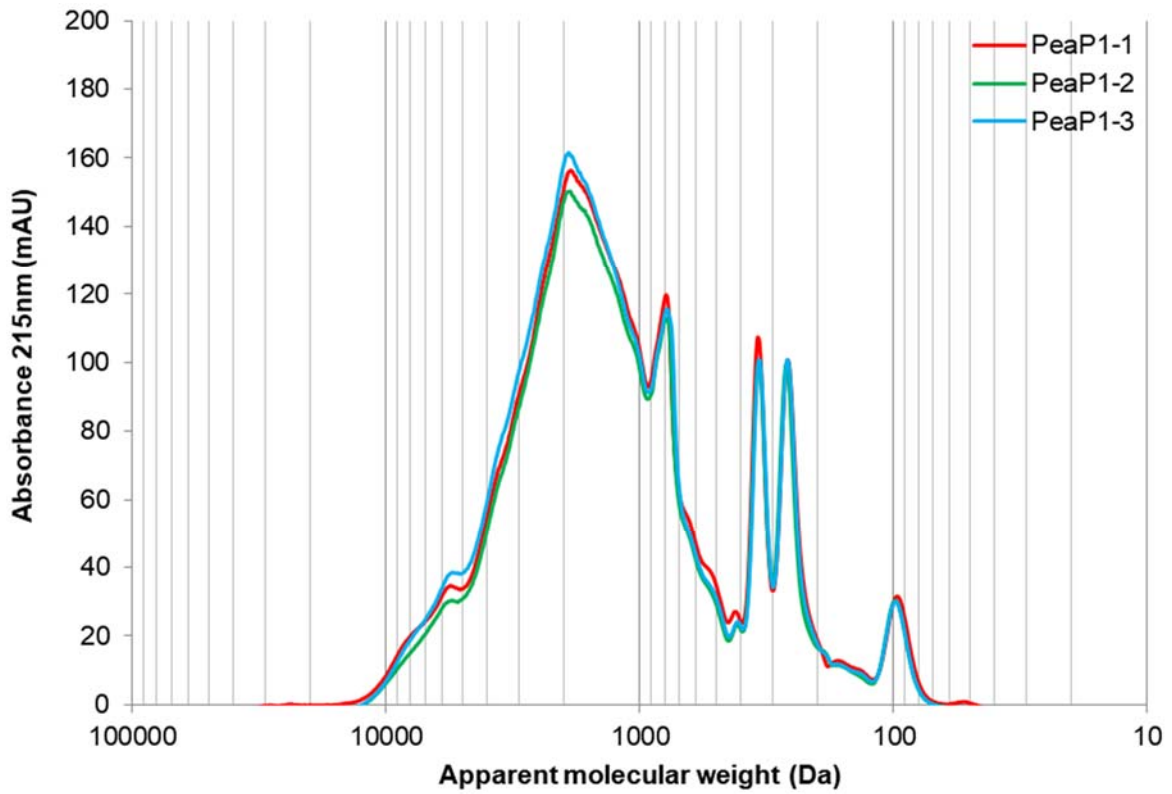

**Figure S1.** Apparent molecular weight peptide profiles of PeaP1 at the end of the SGID intestinal step, obtained after SEC-FPLC. Each curve represents the peptide profile of one replicate.

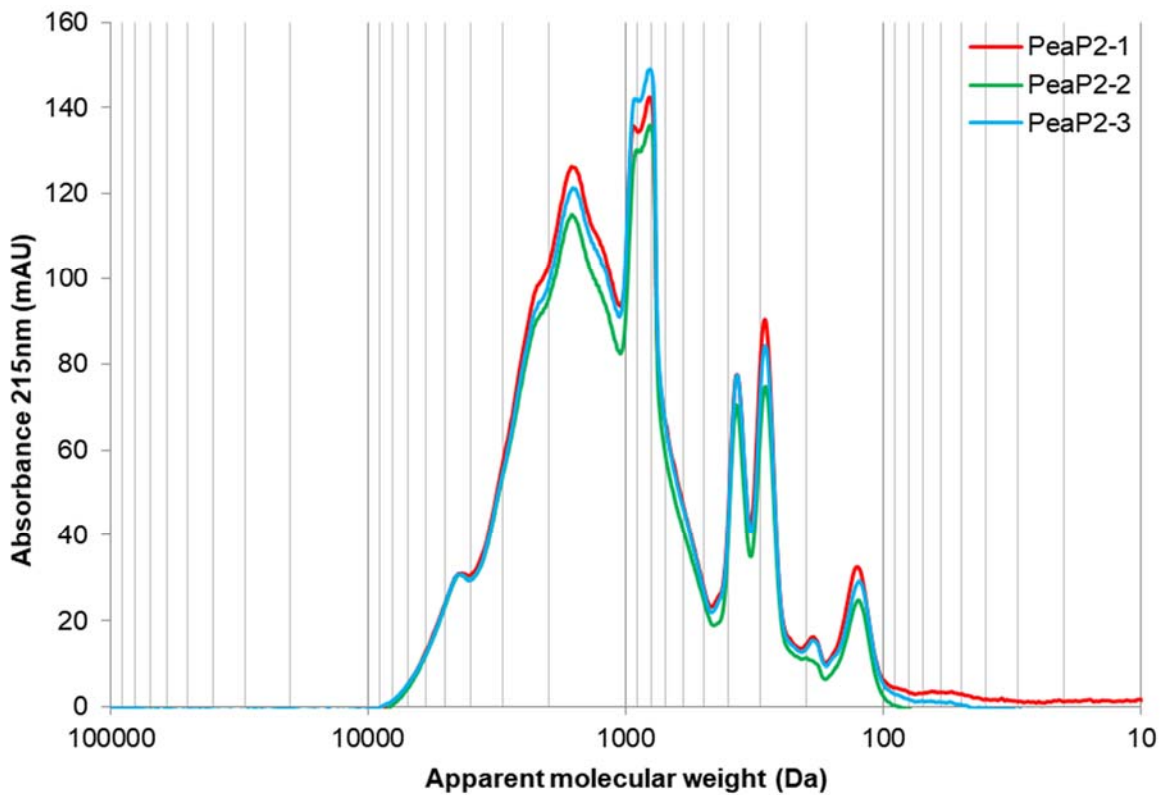

**Figure S2.** Apparent molecular weight peptide profiles of PeaP2 at the end of the SGID intestinal step, obtained after SEC-FPLC. Each curve represents the peptide profile of one replicate.

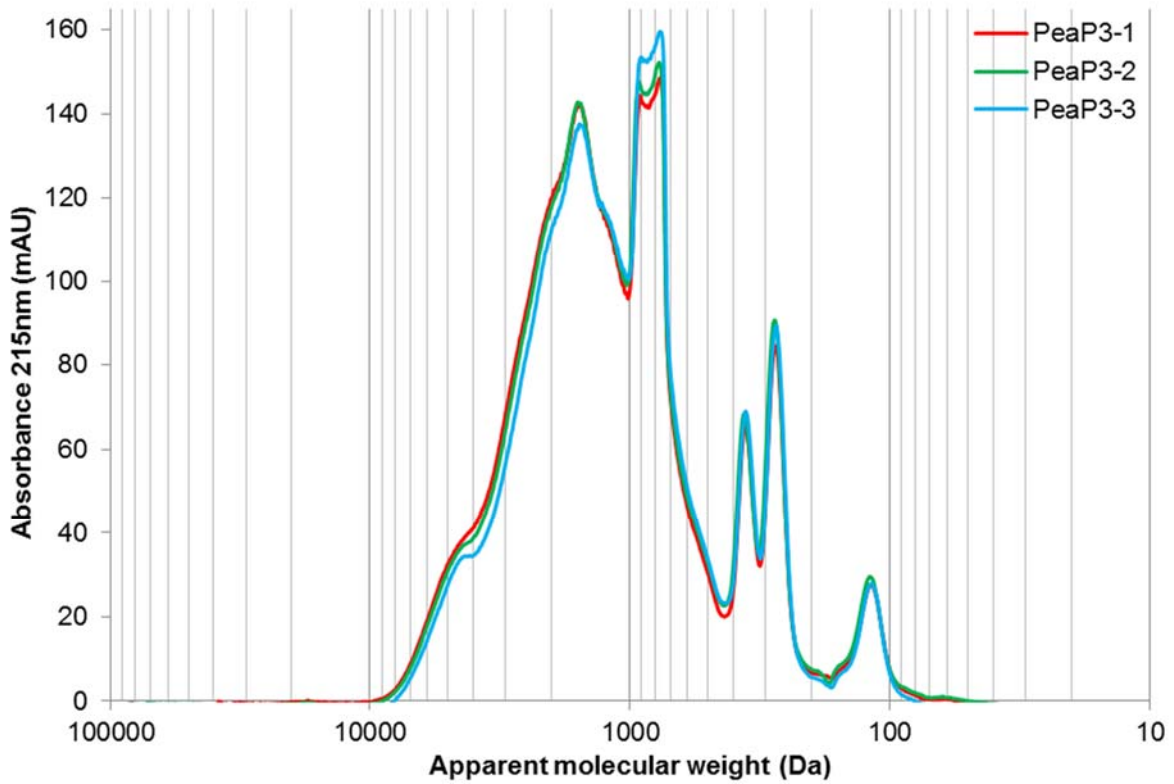

**Figure S3.** Apparent molecular weight peptide profiles of PeaP3 at the end of the SGID intestinal step, obtained after SEC-FPLC. Each curve represents the peptide profile of one replicate.

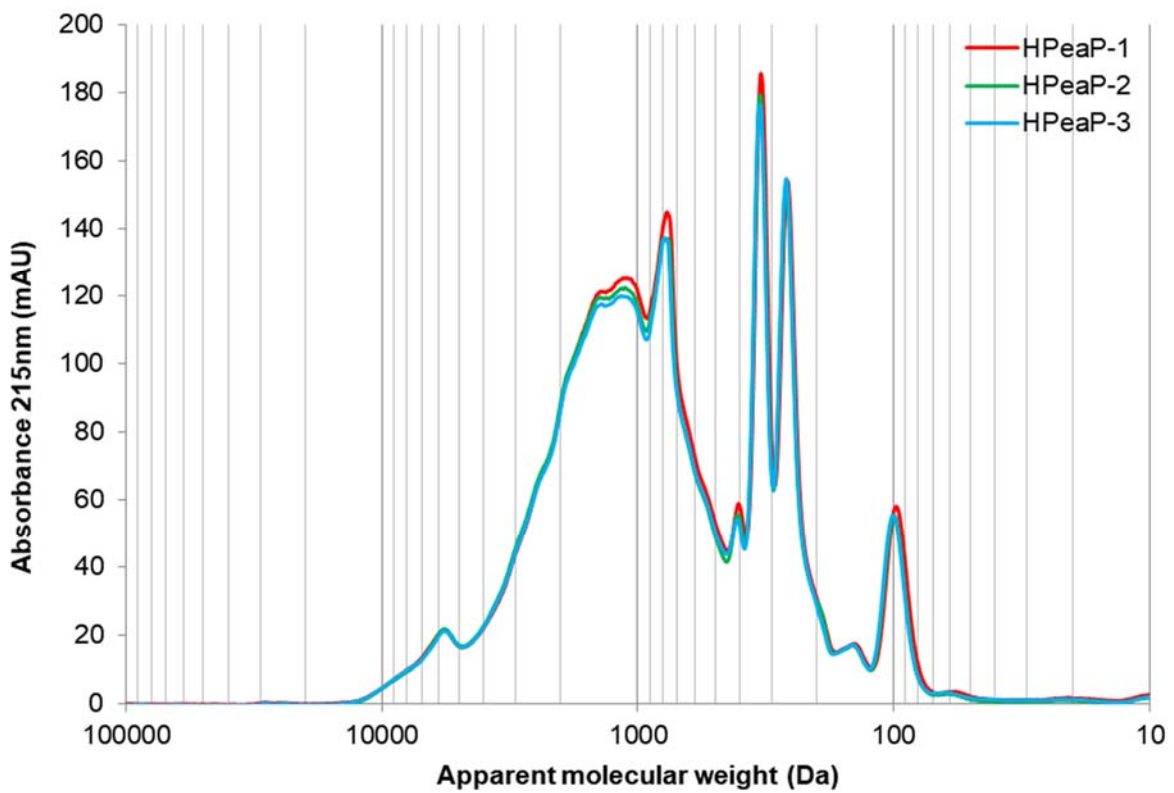

**Figure S4.** Apparent molecular weight peptide profiles of HPeaP at the end of the SGID intestinal step, obtained after SEC-FPLC. Each curve represents the peptide profile of one replicate.

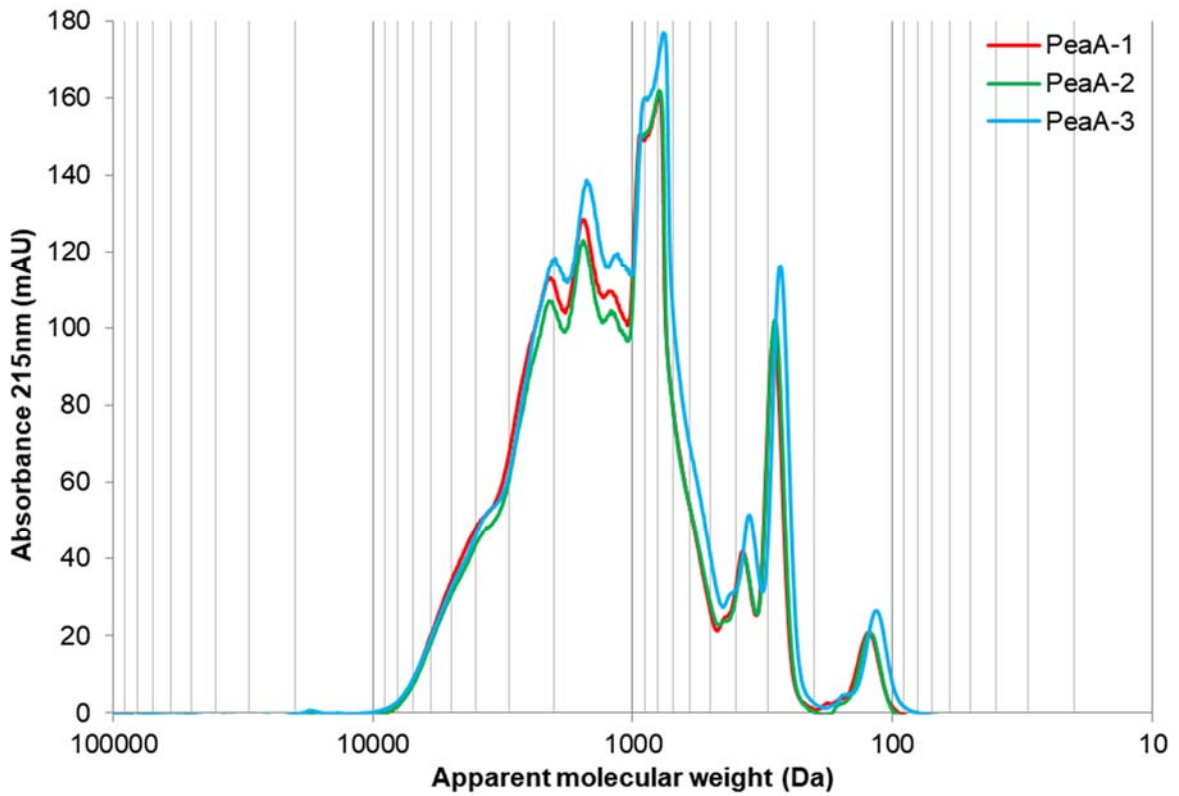

**Figure S5.** Apparent molecular weight peptide profiles of PeaA at the end of the SGID intestinal step, obtained after SEC-FPLC. Each curve represents the peptide profile of one replicate.

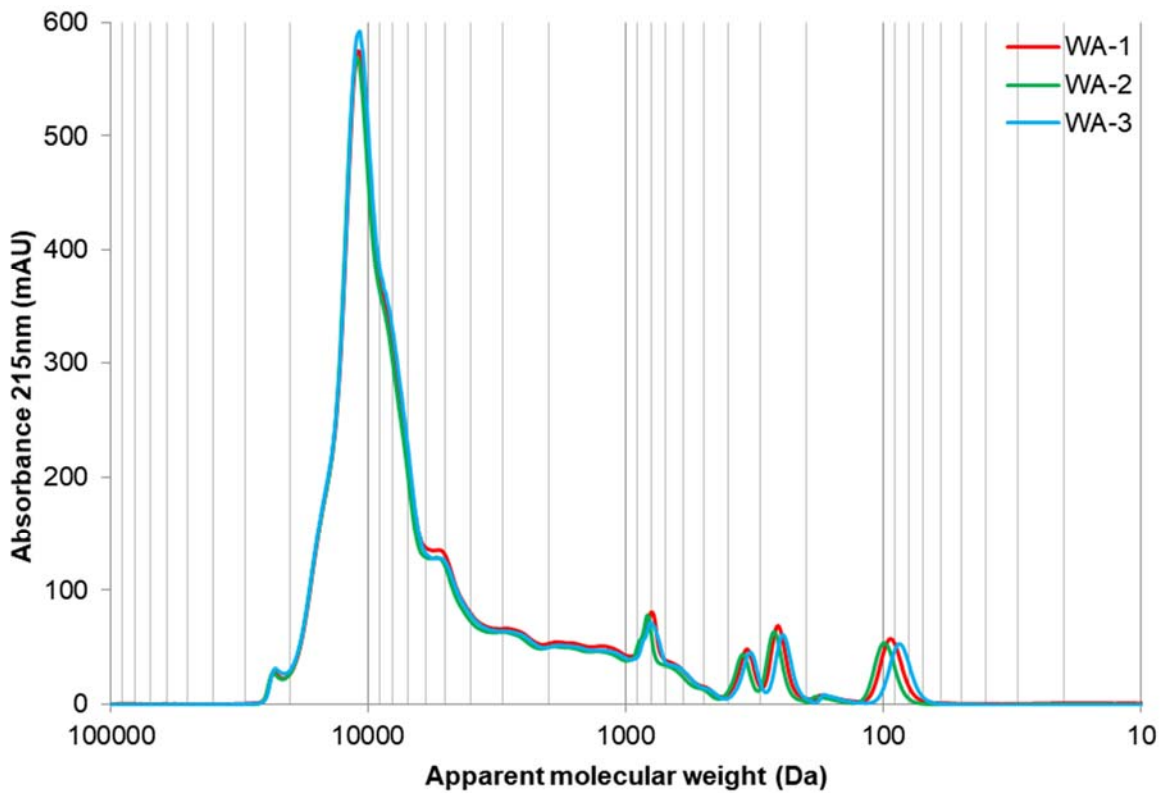

**Figure S6.** Apparent molecular weight peptide profiles of WA at the end of the SGID intestinal step, obtained after SEC-FPLC. Each curve represents the peptide profile of one replicate.

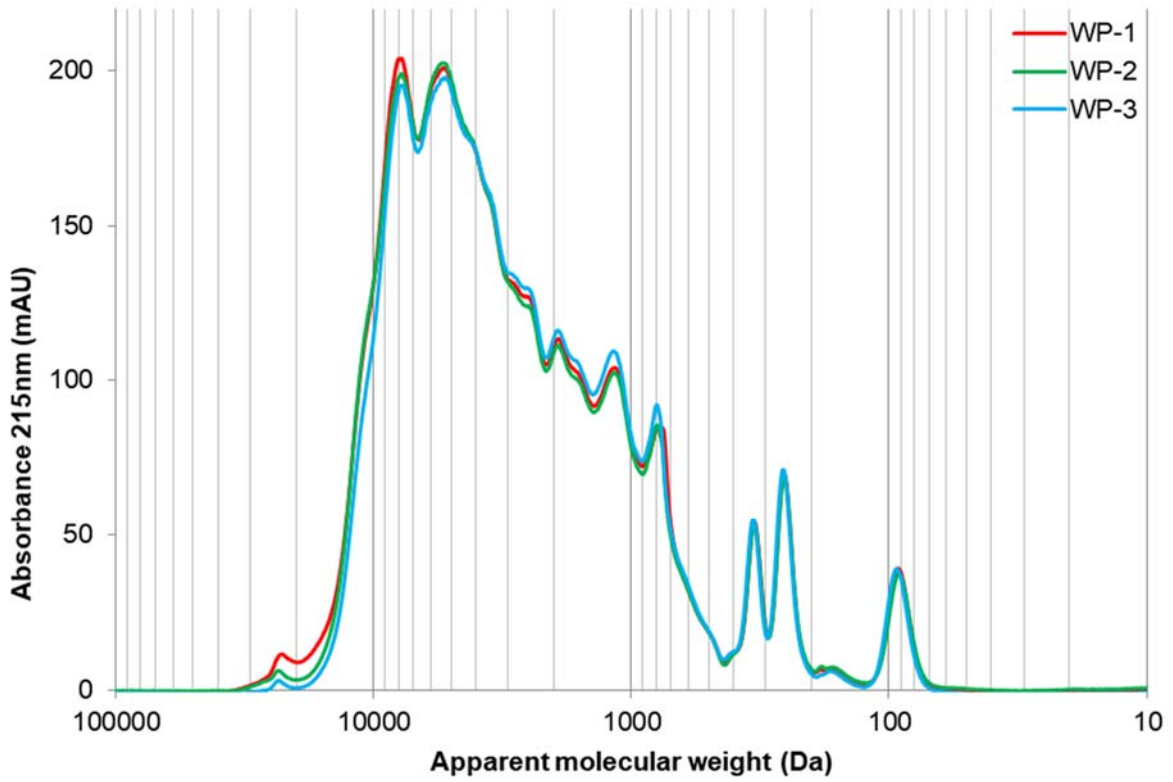

**Figure S7.** Apparent molecular weight peptide profiles of WP at the end of the SGID intestinal step, obtained after SEC-FPLC. Each curve represents the peptide profile of one replicate.

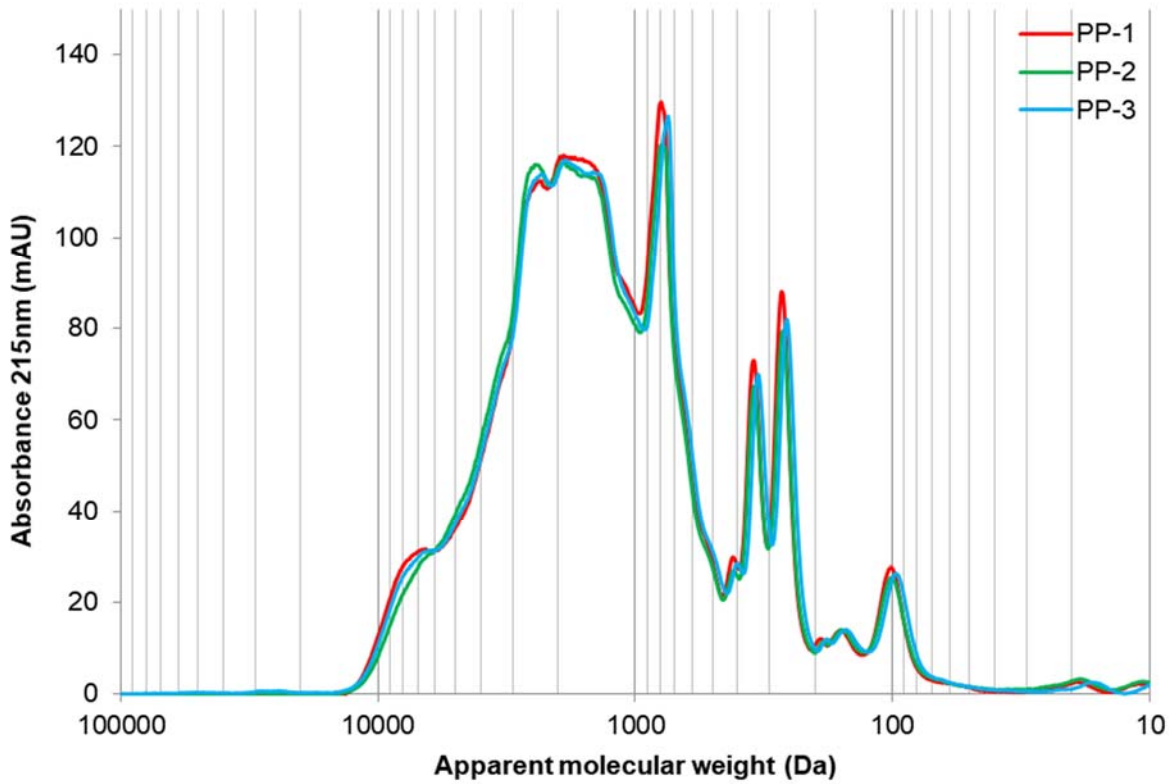

**Figure S8.** Apparent molecular weight peptide profiles of PP at the end of the SGID intestinal step, obtained after SEC-FPLC. Each curve represents the peptide profile of one replicate.

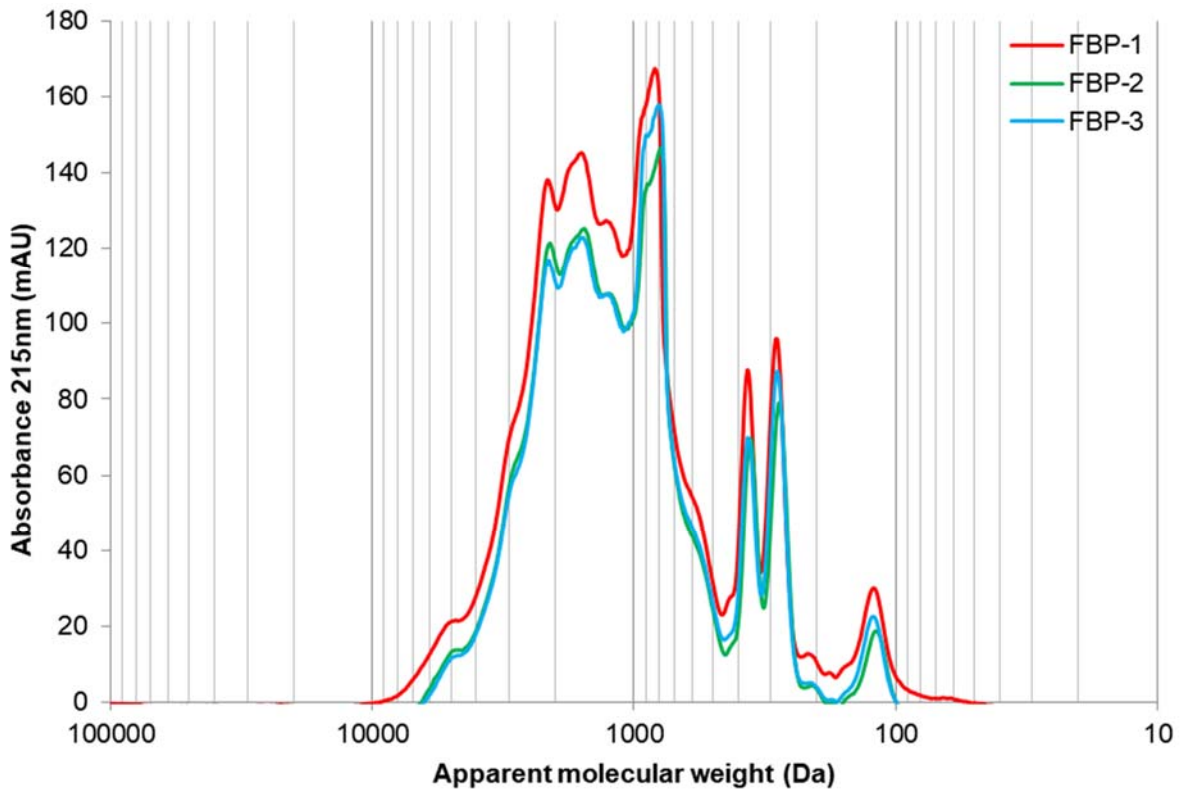

**Figure S9.** Apparent molecular weight peptide profiles of FBP at the end of the SGID intestinal step, obtained after SEC-FPLC. Each curve represents the peptide profile of one replicate.

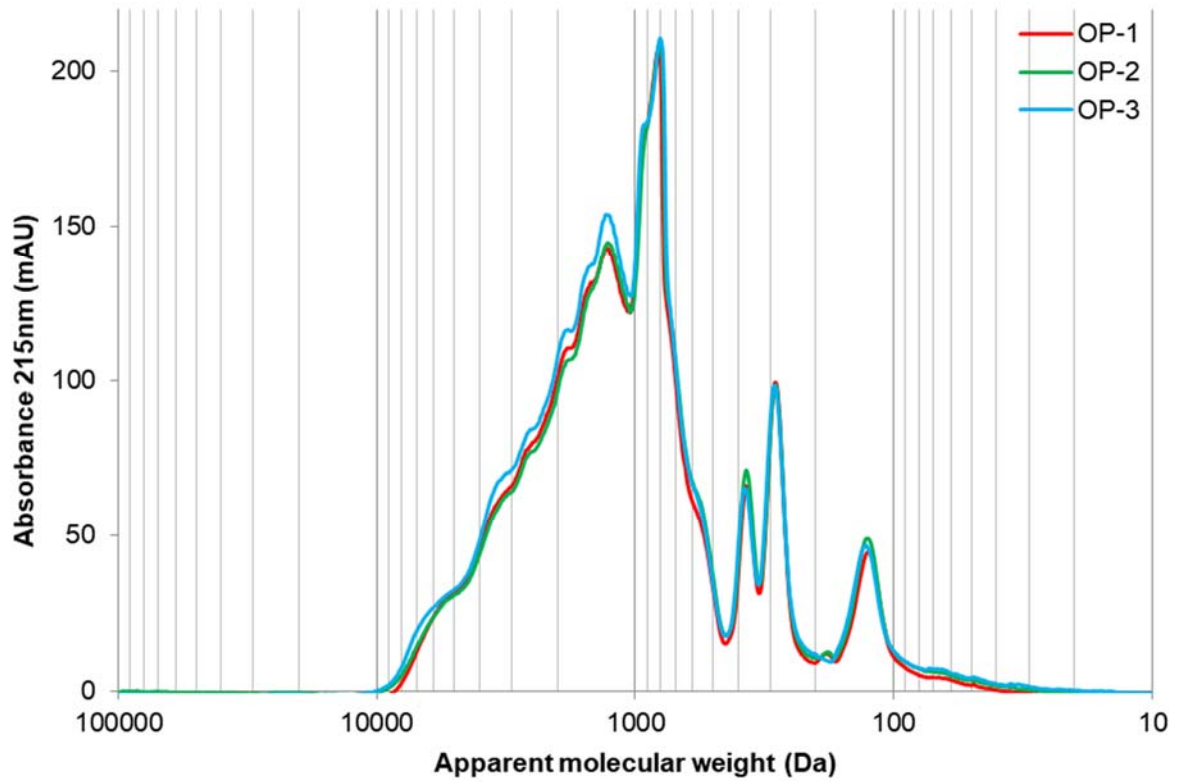

**Figure S10.** Apparent molecular weight peptide profiles of OP at the end of the SGID intestinal step, obtained after SEC-FPLC. Each curve represents the peptide profile of one replicate.

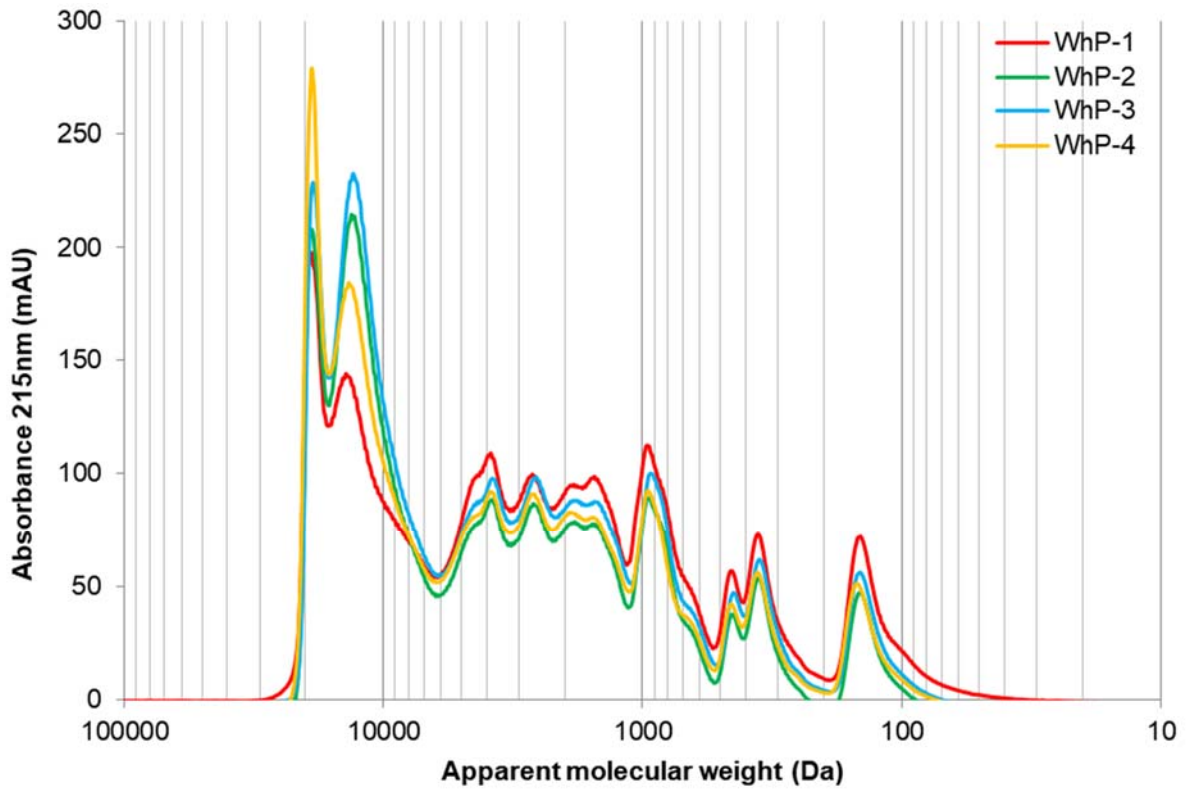

**Figure S11.** Apparent molecular weight peptide profiles of WhP at the end of the SGID intestinal step, obtained after SEC-FPLC. Each curve represents the peptide profile of one replicate.

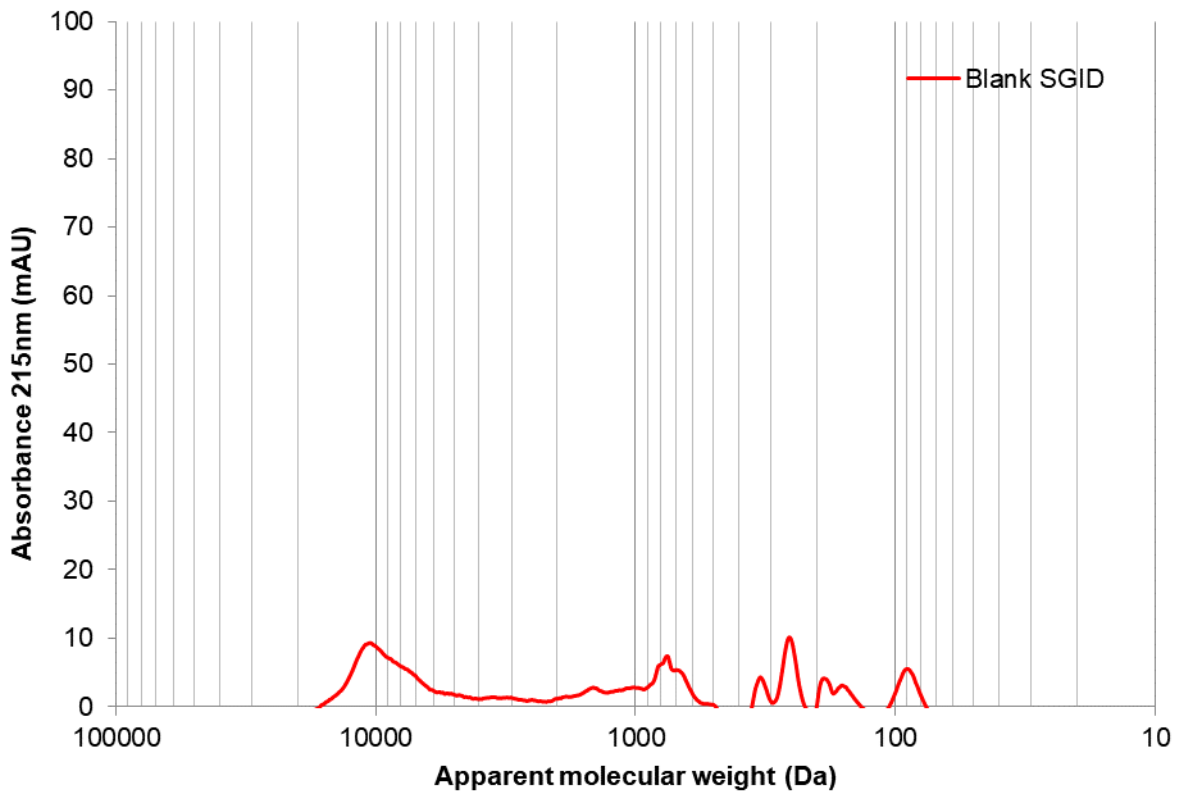

**Figure S12.** Apparent molecular weight peptide profiles of Blank SGID at the end of the intestinal step, obtained after SEC-FPLC.
